# Supplementary material
Source: publisher site journal article supplement (https://www.spandidos-publications.com/4394/downloadSupplementary)

Figure S1. Evaluation of the size (red line) of the histological tumor necrosis.

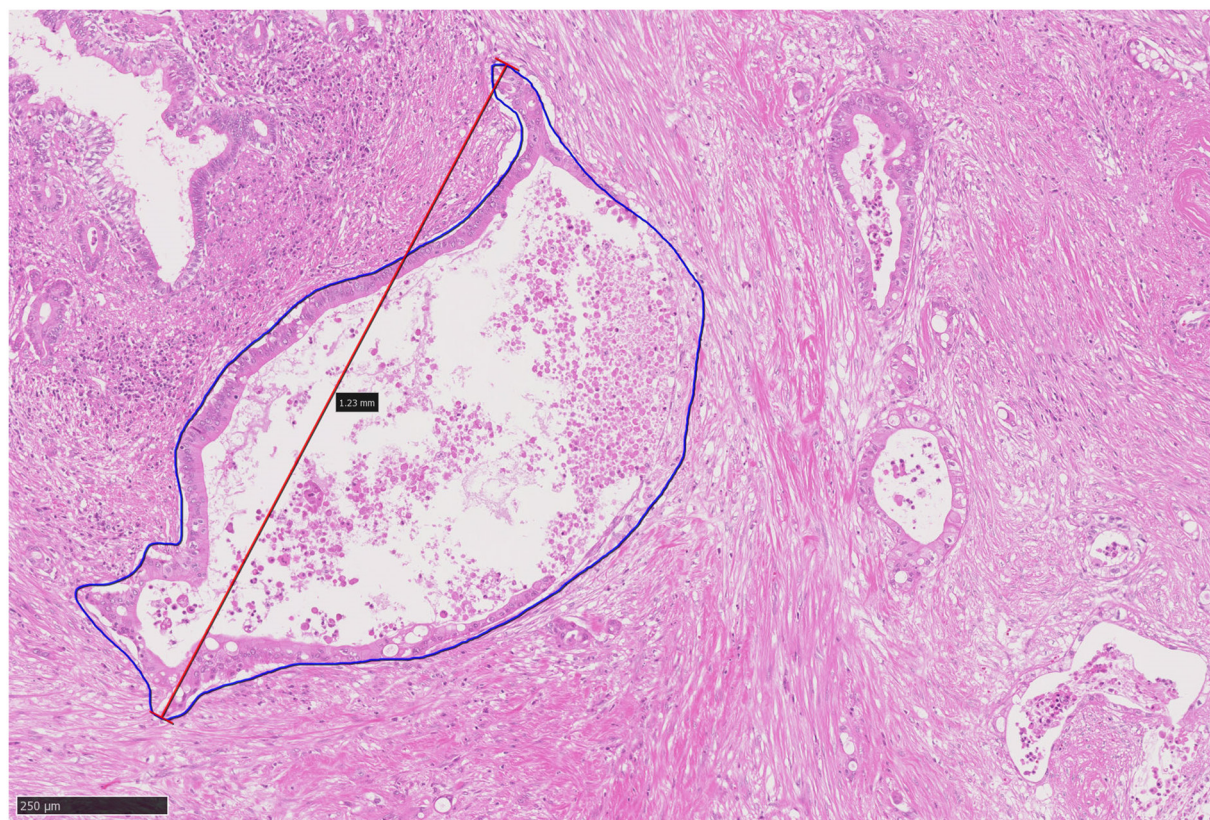

Supplement: Supplementary file 1 [file downloadSupplementary]
